# Supplementary material for: Superhydrophobic Au/polymer nanocomposite films via AACVD/swell encapsulation tandem synthesis procedure
Source: Royal Society of Chemistry journal article supplement (doi:10.1039/c6ra00176a), 2016-01-01
Supplement: c6ra00176a1.pdf [file c6ra00176a1.pdf]

## RSC Advances Supporting Information

### Superhydrophobic Au/polymer nanocomposite films via AACVD/swell encapsulation tandem synthesis procedure

*Sebastian C. Dixon, William J. Peveler, Nuruzzaman Noor, Joseph C. Bear, Ivan P. Parkin\**

\* Corresponding author. Department of Chemistry, University College London, 20 Gordon Street, London, WC1H 0AJ. Tel.: +44 20 7679 4669; fax: +44 20 7679 7463. E-mail address: i.p.parkin@ucl.ac.uk (I.P. Parkin).

## **Transmission Electron Microscopy**

The nanoparticle diameter assay was conducted on a total of 338 particles. The mean nanoparticle diameter was found to be  $4.7 \pm 1.2$  nm with minimum and maximum particle diameters of 2.3 nm and 8.9 nm respectively. The interquartile range was found to be 1.72 nm, with the median nanoparticle diameter at 4.7 nm.

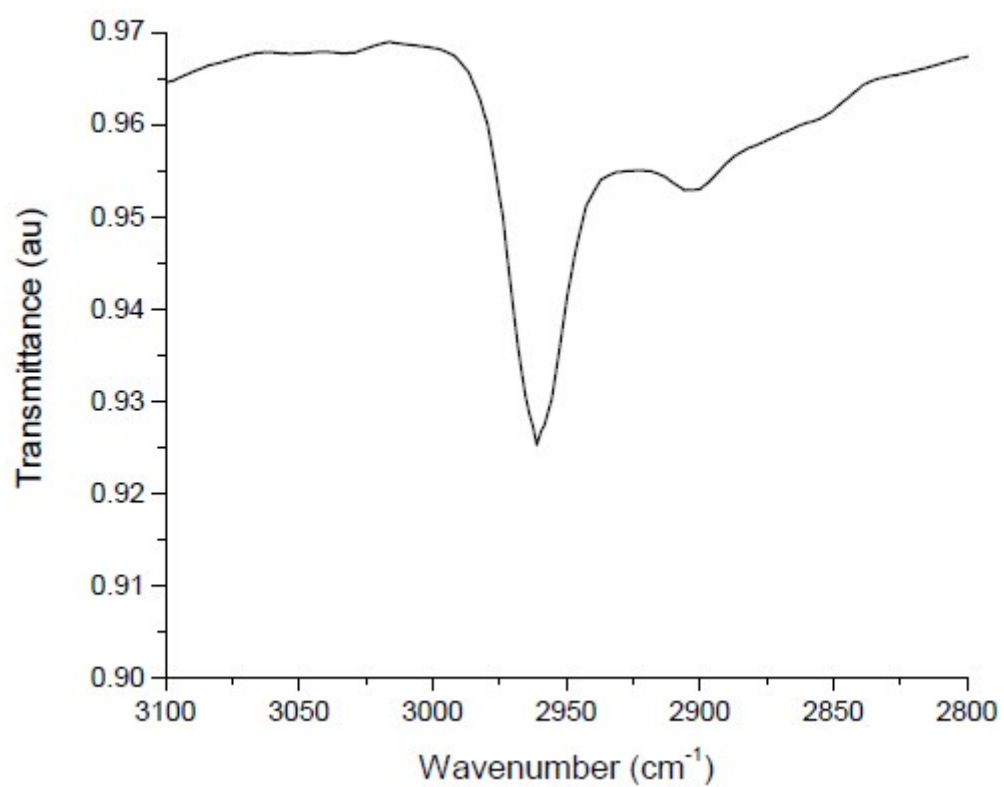

Figure 1 - Attenuated Total Reflection (ATR) FTIR spectrum of superhydrophobic Sylgard-184 film deposited by AACVD at 390°C, displaying expected C-H stretches at 2960 and 2910 cm<sup>-1</sup>.

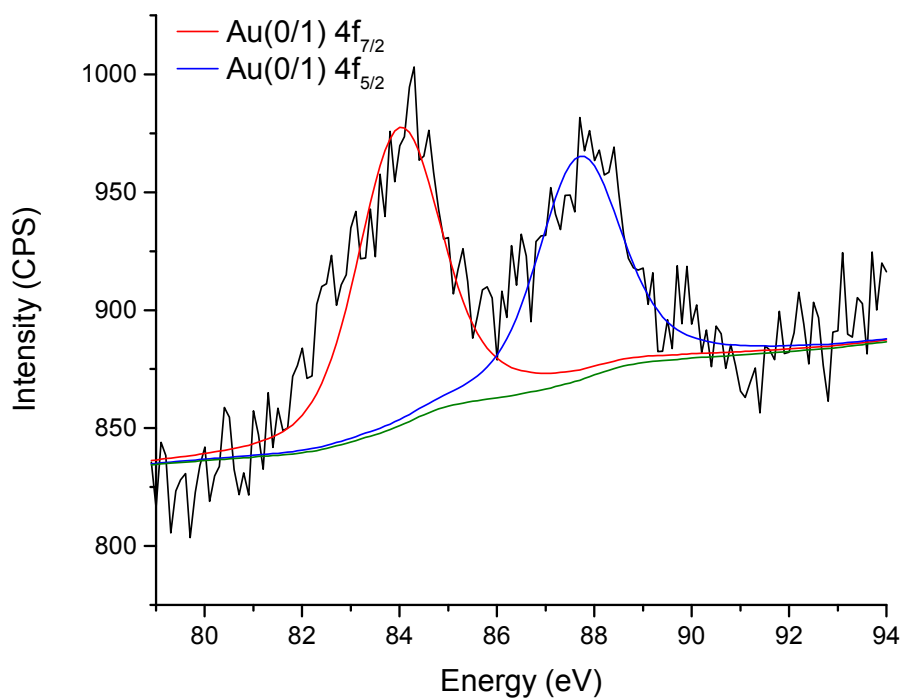

Figure 2 - XPS spectrum of superhydrophobic PDMS film deposited by AACVD then swell-encapsulated for 2 h in a toluene dispersion of Au at approximate concentration 0.1 g/L. The low intensity made deconvolution difficult; the analysis shown is of overlapping Au(0) and Au(I) doublet peaks.

|                              | As-deposited                                                                                                | Post-swelling                                                                                                |
|------------------------------|-------------------------------------------------------------------------------------------------------------|--------------------------------------------------------------------------------------------------------------|
| <i>Pre- test</i>             | 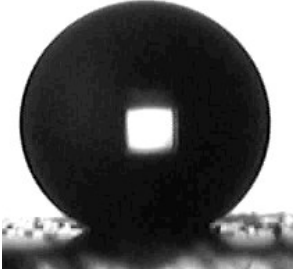<br>$\theta_c = 169^\circ$ | <br>$\theta_c = 158^\circ$ |
| <i>Post-Scotch tape test</i> | <br>$\theta_c = 163^\circ$ | <br>$\theta_c = 160^\circ$ |

*Table 1 - Measurement of contact angles of as-deposited and post-swelling superhydrophobic PDMS thin films, before and after applying the Scotch tape test to each.*

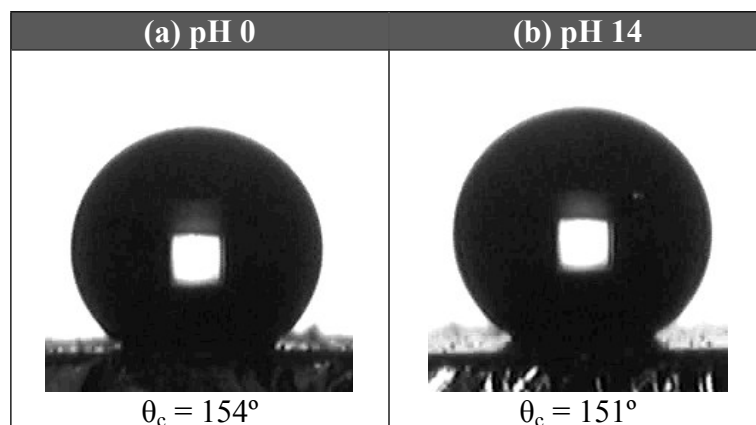

Table 2 - Measurement of contact angles of superhydrophobic PDMS films, soaked for an hour in aqueous solutions of (a) 1M HCl (pH 0), and; (b) 1M NaOH (pH 14).
